# Supplementary material for: Isolation and identification of unstable components from Caesalpinia sappan by high-speed counter-current chromatography combined with preparative high-performance liquid chromatography
Source: publisher site journal article supplement (doi:10.1515/chem-2022-0172), 2022-01-01
Supplement: Supplementary file 1 [file chem-2022-0172_sm.pdf]

## Supplementary material

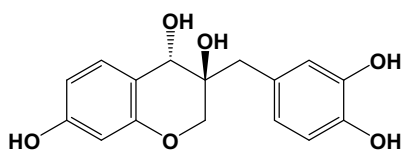

**episappanol**

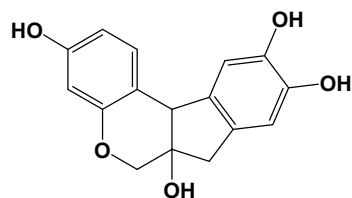

**brazilin**

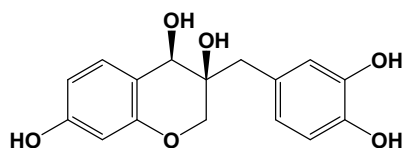

**sappanol**

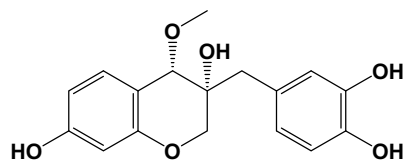

**4-O-methylsappanol**

**Figure S1:** Chemical structures of characteristic peaks.

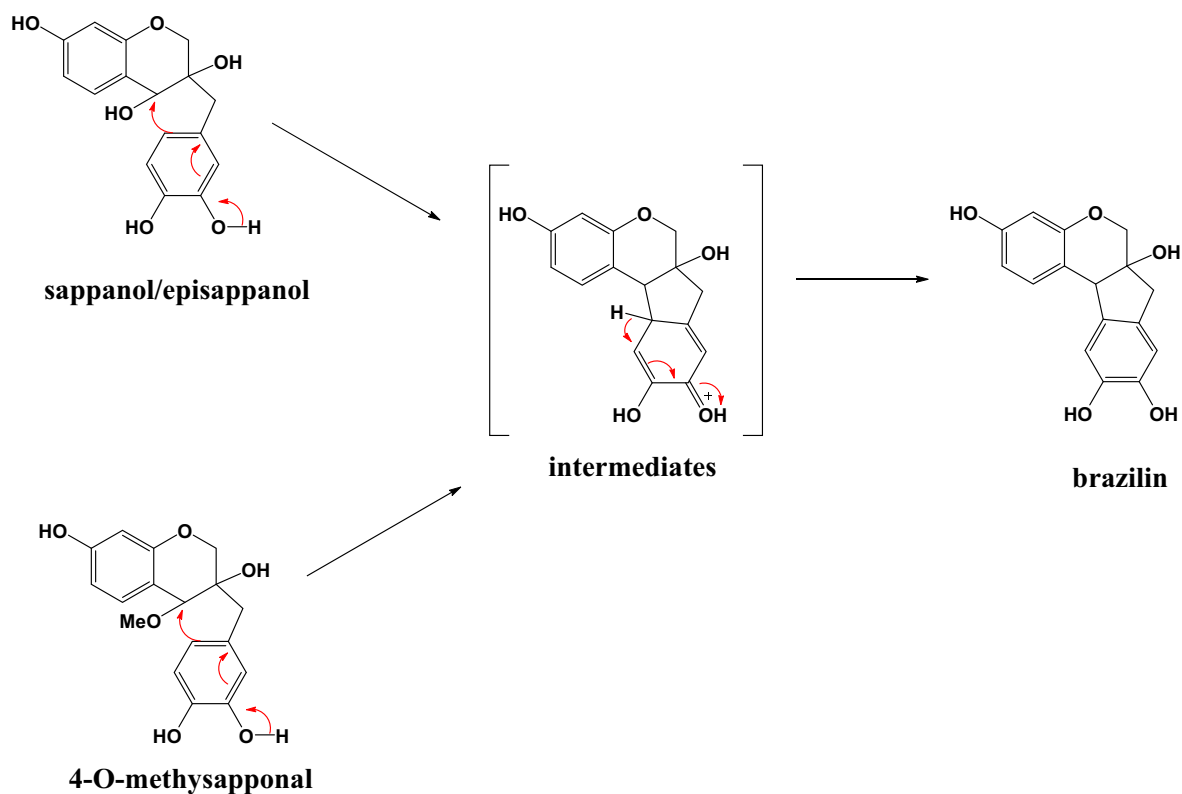

**Figure S2:** Possible conversion pathways of characteristic peaks.

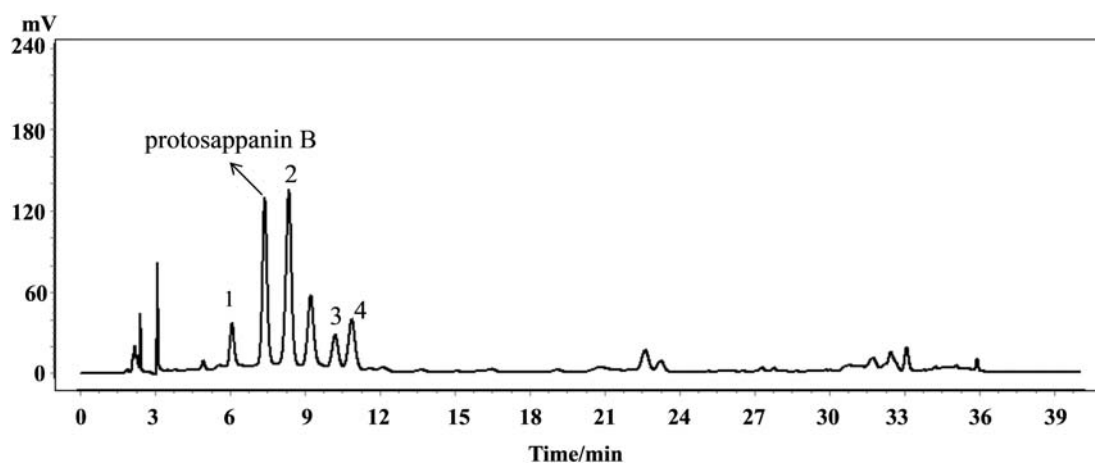

**Figure S3:** HPLC fingerprint of *Caesalpinia sappan* L. peak 1: episappanol; peak 2: brazilin; peak 3: sappanol; peak 4: 4-O-methylsappanol.
